# Supplementary material for: Risk Perception of COVID-19 Infection and Adherence to Preventive Measures among Adolescents and Young Adults
Source: MDPI journal article supplement (doi:10.3390/children7120311), 2020-12-21
Supplement: s1 [file s1]

**Table S1.** Associations between perceived level of information, sources of information and overall level of knowledge about COVID-19 <sup>a</sup>.

|                                               | Not well informed ( <i>n</i> = 291) | Well informed ( <i>n</i> = 2746) | <i>P</i> Value |
|-----------------------------------------------|-------------------------------------|----------------------------------|----------------|
| Disease knowledge score, No. (%) <sup>b</sup> |                                     |                                  |                |
| < 50%                                         | 3 (1.0)                             | 7 (0.2)                          | .01            |
| 50%–74%                                       | 70 (24.0)                           | 557 (20.3)                       |                |
| 75%–89%                                       | 166 (57.0)                          | 1513 (55.1)                      |                |
| ≥ 90%                                         | 52 (17.9)                           | 669 (24.4)                       |                |
| Sources of information, No. (%) <sup>c</sup>  |                                     |                                  |                |
| Email from school                             | 34 (11.7)                           | 487 (17.7)                       | < .001         |
| Family                                        | 90 (30.9)                           | 1142 (41.6)                      | .01            |
| Government press conference                   | 85 (29.2)                           | 1429 (52.0)                      | < .001         |
| Other governmental source                     | 20 (6.9)                            | 364 (13.3)                       | < .001         |
| Health care organization                      | 14 (4.8)                            | 312 (11.3)                       | < .001         |
| Healthcare professional                       | 14 (4.8)                            | 326 (11.9)                       | < .001         |
| TV or radio                                   | 98 (33.7)                           | 1497 (54.5)                      | < .001         |
| Facebook                                      | 35 (12.0)                           | 398 (14.5)                       | .01            |

a. All percentages are column percentages, b. Disease knowledge score represents a participant's cumulative score on 20 true or false questions about COVID-19 disease characteristics, c. Participants could select more than one source of information.

**Table S2.** Motivations for taking preventive measures against COVID-19 <sup>a</sup>

| No. (%)                                       | Low respect for preventive measures ( <i>n</i> = 1214) | High respect for preventive measures <sup>b</sup> ( <i>n</i> = 1823) | <i>P</i> Value |
|-----------------------------------------------|--------------------------------------------------------|----------------------------------------------------------------------|----------------|
| Positive motivators                           |                                                        |                                                                      |                |
| Want to help to flatten the curve             | 1174 (96.7)                                            | 1805 (99.0)                                                          | < .001         |
| Want to protect family and friends            | 1200 (98.8)                                            | 1818 (99.7)                                                          | .003           |
| Negative motivators                           |                                                        |                                                                      |                |
| Negative impact of confinement on social life | 863 (71.1)                                             | 1249 (68.5)                                                          | .13            |
| Do not feel concerned by the COVID19 pandemic | 245 (20.2)                                             | 262 (14.4)                                                           | < .001         |

a. All percentages are column percentages, b. Defined as self-reported respect of all following preventive measures: regular handwashing, avoiding group gathering, reducing unnecessary use of public transport, and avoiding public places.
